# Supplementary material for: Cordyceps sinensis relieves non-small cell lung cancer by inhibiting the MAPK pathway
Source: Springer Nature journal article supplement (doi:10.1186/s13020-024-00895-0), 2024-03-25
Supplement: MOESM1 [file 26899058]

## Supplementary material

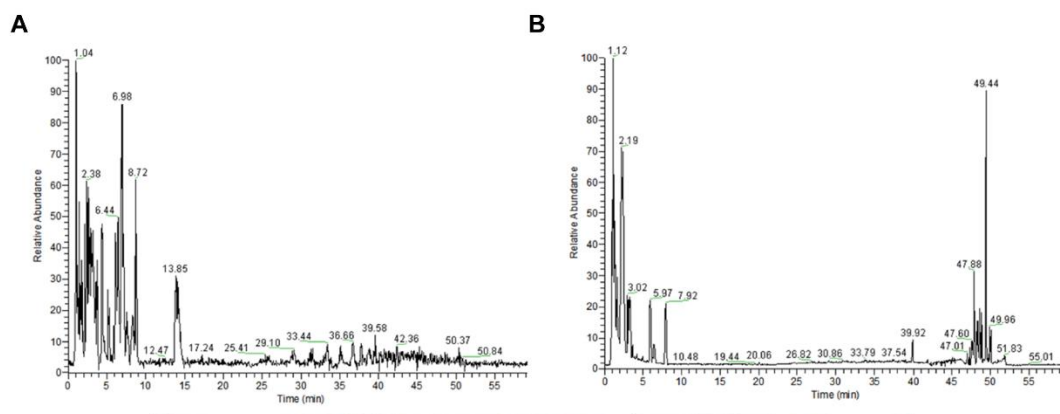

**Figure S1. Quality control data of *Cordyceps sinensis* powder (Bailing Capsule). (A- B) TIC diagram of the *Cordyceps sinensis* powder in Bailing Capsule UHPLC-LTQ-Orbitrap-MS, and (A) for positive mode, (B) for negative mode.**

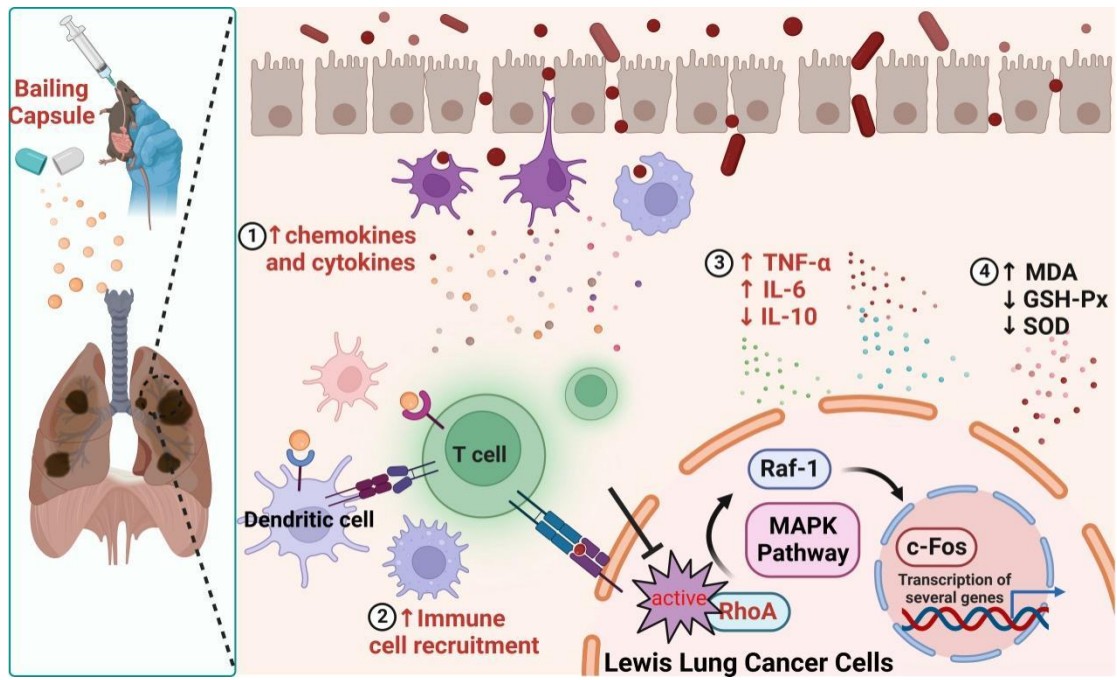

**Figure S2** *Cordyceps sinensis* likely exerted a protective effect against NSCLC by suppressing the RhoA gene, then recruiting immune cells, enhancing immune function, and inhibiting lung cancer via the MAPK pathway
